# Supplementary material for: Evaluation of Safety for Scanning Carbon-Ion Radiotherapy in Hemodialysis Patients with Prostate Cancer
Source: Research Square preprint supplement (doi:10.21203/rs.3.rs-1153921/v1), 2021-12-29
Supplement: Supplementary file 2 [file 6f50977de00e9200d7aced9b.xlsx]

## Sheet: Sheet1
Table 1. Patient characteristics
No.	Age	iPSA	T stage	GS	D'Amico	HD duration	urination	ADT	follow- up
		(nd/mL)			classification	(year)	(mL/day)		(month)
1	71	19.2	3a	4 + 4	high	22	-	CAB	24
2	66	46.3	2a	3 + 4	high	33	-	CAB	22
3	68	6.581	1c	4 + 5	high	11	-	CAB	21
4	75	20.561	2c	4 + 4	high	30	<150	CAB	15
5	64	19.66	2c	5 + 4	high	6	<500	CAB	12
	PSA: prostate specific antigen, GS: Gleason score, HD hemodialysis, ADT: androgen deprivation therapy
	CAB: combined androgen blockade
