# Supplementary material for: Evaluation of Safety for Scanning Carbon-Ion Radiotherapy in Hemodialysis Patients with Prostate Cancer
Source: Research Square preprint supplement (doi:10.21203/rs.3.rs-1153921/v1), 2021-12-29
Supplement: Supplementary file 3 [file c383a5c637be3353de514ae8.xlsx]

## Sheet: Sheet1
Table 2. Toxicity
		Acute toxicity, Grade				Late toxicity, Grade
No.		GU	GI	other		GU	GI	other
1		0	0	0		0	0	0
2		0	0	0		0	0	0
3		1	0	0		1	0	0
4		0	0	0		1	0	0
5		0	0	0		0	0	0
GU: genitourinary, GI: gastrointestinal
