# Supplementary material for: Evaluation of Safety for Scanning Carbon-Ion Radiotherapy in Hemodialysis Patients with Prostate Cancer
Source: Research Square preprint supplement (doi:10.21203/rs.3.rs-1153921/v1), 2021-12-29
Supplement: Supplementary file 5 [file 553fca92835d34450072b52b.xlsx]

## Sheet: Sheet1
Table 4. DVH parameters for normal organs in plan CT and in-room CT
				mean ± SD
	DVH parameters			plan CT	in-room CT		p-value
	Bladder
	V10Gy(RBE) (%)			67.7 ± 26.9	60.0 ± 19.4		0.15
	V20Gy(RBE) (%)			60.6 ± 25.7	50.8 ± 17.9		0.206
	V30Gy(RBE) (%)			52.5 ± 22.9	42.7 ± 16.4		0.206
	V40Gy(RBE) (%)			42.3 ± 18.5	33.9 ± 139		0.239
	V50Gy(RBE) (%)			24.3 ± 10.6	18.4 ± 8.2		0.15
	Dmean [Gy(RBE)]			28.0 ± 11.4	23.8 ± 8.1		0.15
	Rectum
	V10Gy(RBE) (%)			26.1 ± 6.6	27.4 ± 9.2		0.695
	V20Gy(RBE) (%)			17.7 ± 4.4	19.1 ± 8.2		0.571
	V30Gy(RBE) (%)			11.2 ± 2.6	12.9 ± 7.4		0.965
	V40Gy(RBE) (%)			5.4 ± 1.1	7.6 ± 6.3		0.827
	V50Gy(RBE) (%)			0.0 ± 0.0	2.5 ± 3.3		0.755
	Dmean [Gy(RBE)]			8.4 ± 2.0	9.2 ± 3.7		0.458
	V80% (cc)			2.2 ± 0.4	3.8 ± 3.7		0.827
	Intestine
	Dmax [Gy(RBE)]			15.6 ± 13.5	13.6 ± 16.1		0.695
	DVH: dose-volume histogram, CT: computed tomography, CTV: clinical target volume, SD: standard deviation
	RBE: relative biological effectiveness
