# Supplementary material for: Evaluation of Safety for Scanning Carbon-Ion Radiotherapy in Hemodialysis Patients with Prostate Cancer
Source: Research Square preprint supplement (doi:10.21203/rs.3.rs-1153921/v1), 2021-12-29
Supplement: Supplementary file 6 [file e9a95931b9ee55a3be3ec452.xlsx]

## Sheet: Sheet1
Table 3. DVH parameters for CTV in plan CT and in-room CT
				mean ± SD
	DVH parameters			plan CT	in-room CT		p-value
	CTV
	D98% [Gy(RBE)]			50.8 ± 0.4	50.0 ± 1.5		0.458
	D95% [Gy(RBE)]			51.1 ± 0.3	50.9 ± 0.6		0.76
	D50% [Gy(RBE)]			51.6 ± 0.0	51.6 ± 0.0		0.315
	D2% [Gy(RBE)]			52.0 ± 0.1	52.0 ± 0.1		0.513
	Homogenity index			0.02 ± 0.0	0.04 ± 0.03		0.275
	DVH: dose-volume histogram, CT: computed tomography, CTV: clinical target volume, SD: standard deviation
	RBE: relative biological effectiveness
